# Supplementary material for: NF-κB Activity Initiates Human ESC-Derived Neural Progenitor Cell Differentiation by Inducing a Metabolic Maturation Program
Source: PubMed Central journal article supplement — Stem Cell Reports. 2018 Apr 19;10(6):1766–81. doi: 10.1016/j.stemcr.2018.03.015 (PMC5989595; doi:10.1016/j.stemcr.2018.03.015), 2018-04-19
Supplement: mmc1.pdf [file mmc1.pdf]

**Stem Cell Reports, Volume 10**

**Supplemental Information**

**NF- $\kappa$ B Activity Initiates Human ESC-Derived Neural Progenitor Cell Differentiation by Inducing a Metabolic Maturation Program**

**Lorna M. FitzPatrick, Kate E. Hawkins, Juliette M.K.M. Delhove, Emilio Fernandez, Chiara Soldati, Louise F. Bullen, Axel Nohturfft, Simon N. Waddington, Diego L. Medina, Juan P. Bolaños, and Tristan R. McKay**

# Figure S1.

A.

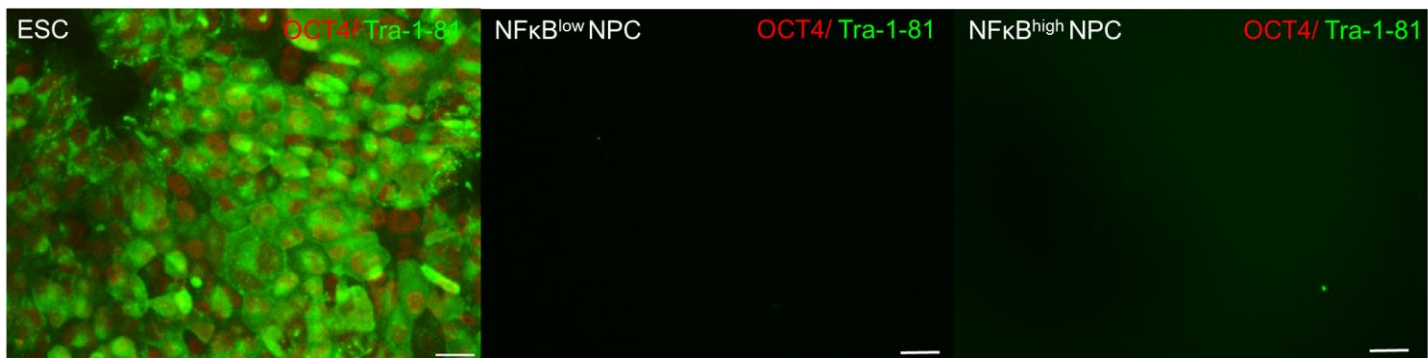

B.

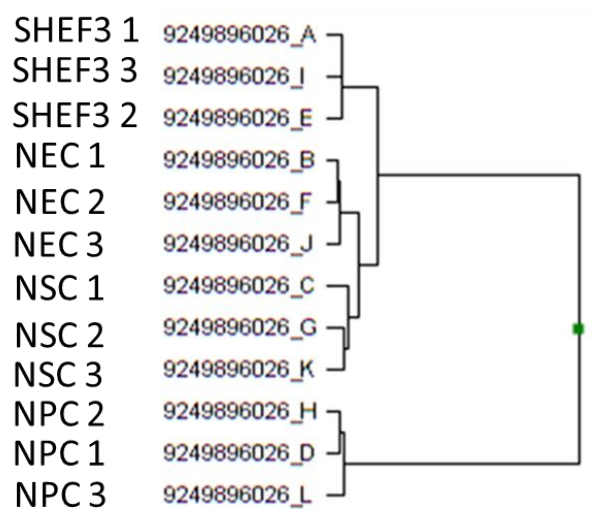

C.

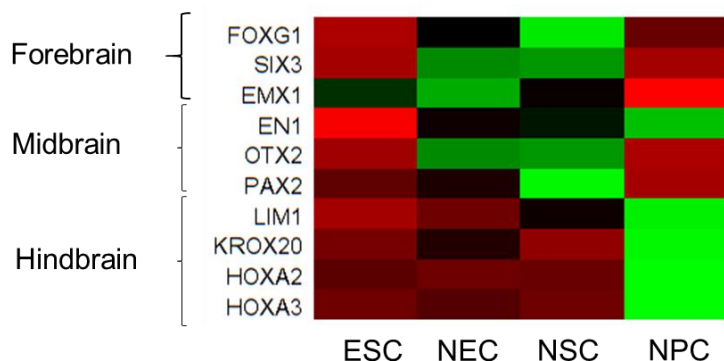

D.

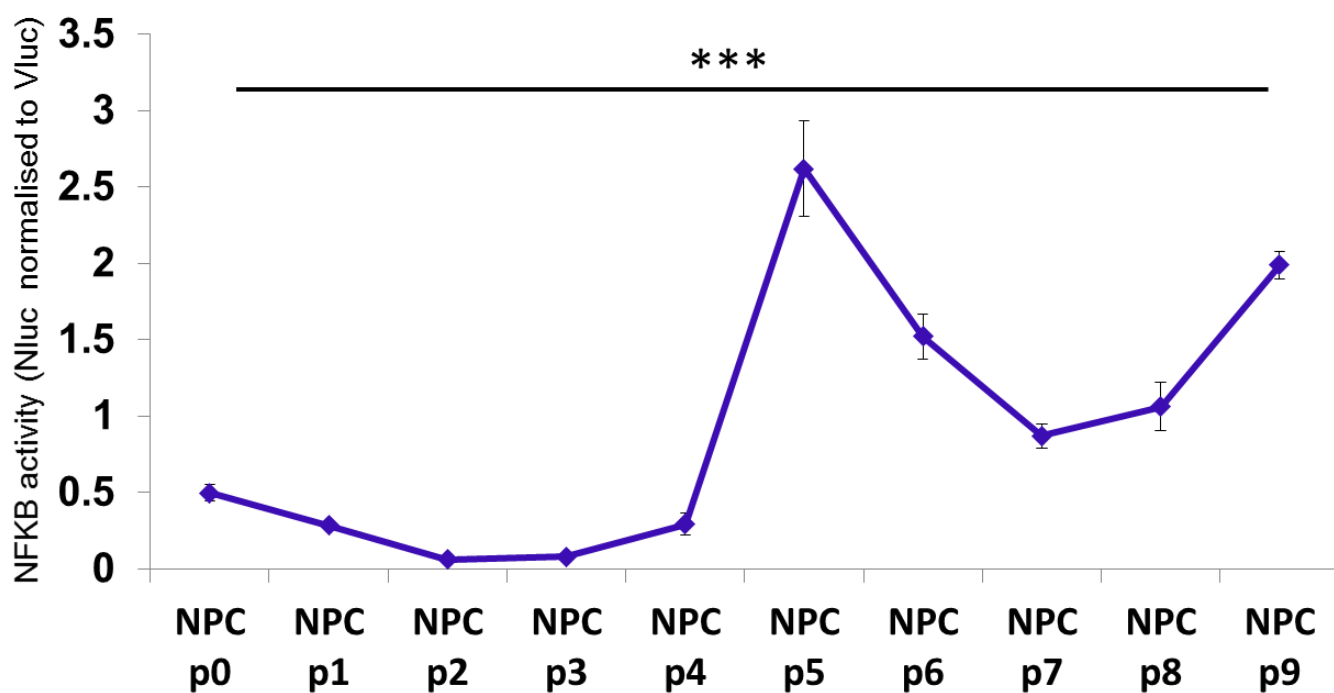

**Figure S1. Immunocytochemical and transcriptomic characterisation of differentiating hESC.** (A)(Left-right): Feeder-free hESC  $\text{NF}\kappa\text{B}^{\text{low}}$  and  $\text{NF}\kappa\text{B}^{\text{high}}$  NPC expression of the pluripotency genes; transcription factor OCT4 and cell surface marker, Tra 1-81, scale bar = 20 $\mu\text{m}$ , related to Fig. 1A-D.(B) Hierarchical clustering of biological replicates from the microarray of ESC, NEC, NRPC and NPC, relates to Fig. 1E. (C) Analysis of regional markers in differentiating cultures, relating to Fig. 1E. (D) Continuous monitoring of NFκB activity at each NPC passage (n=3  $\pm$  s.e.m. \*\*\*p $\leq$ 0.001, statistical test : one way ANOVA), related to Fig 3C.

# Figure S2.

## A.

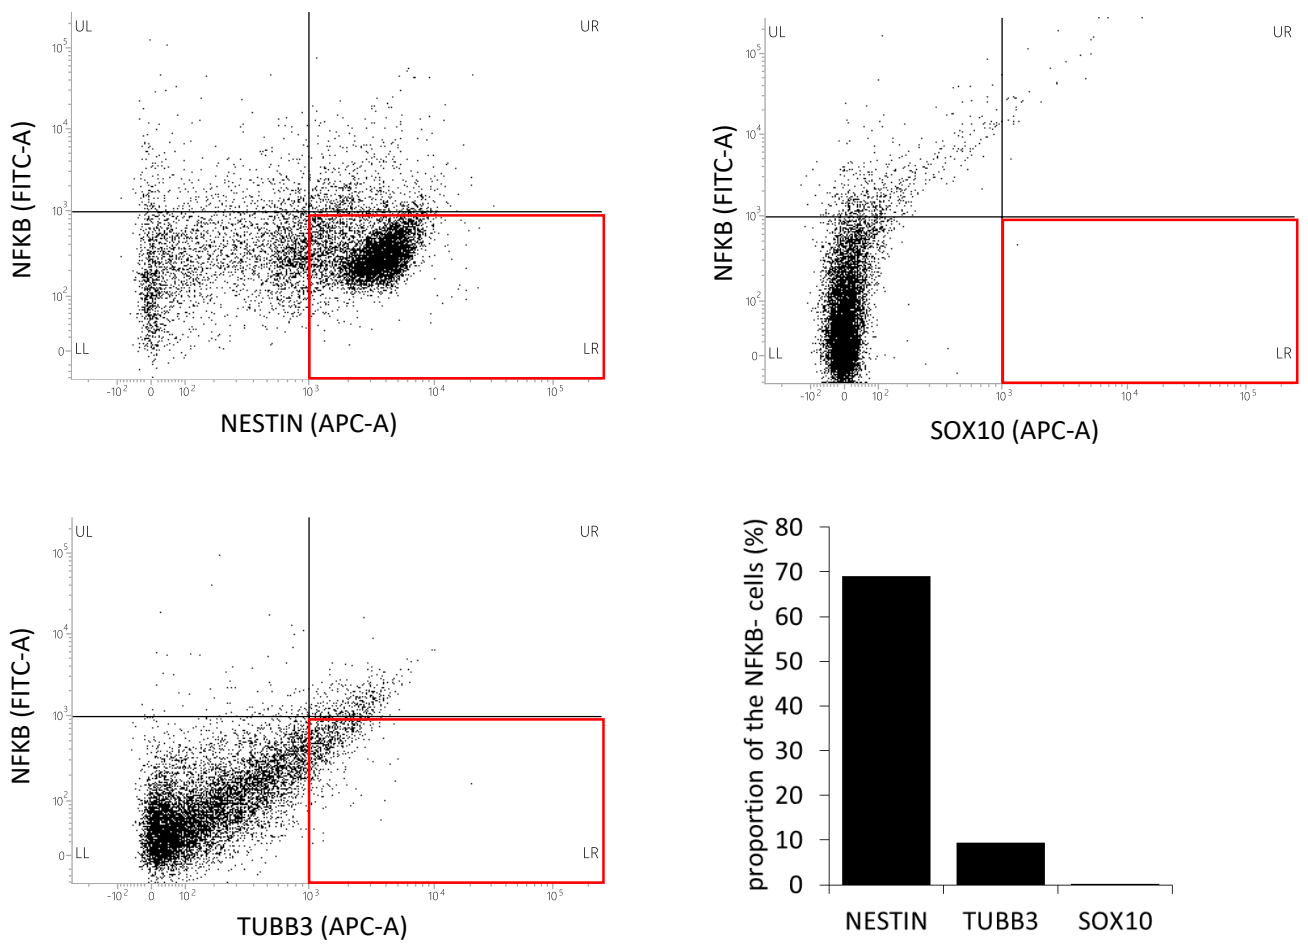

## B.

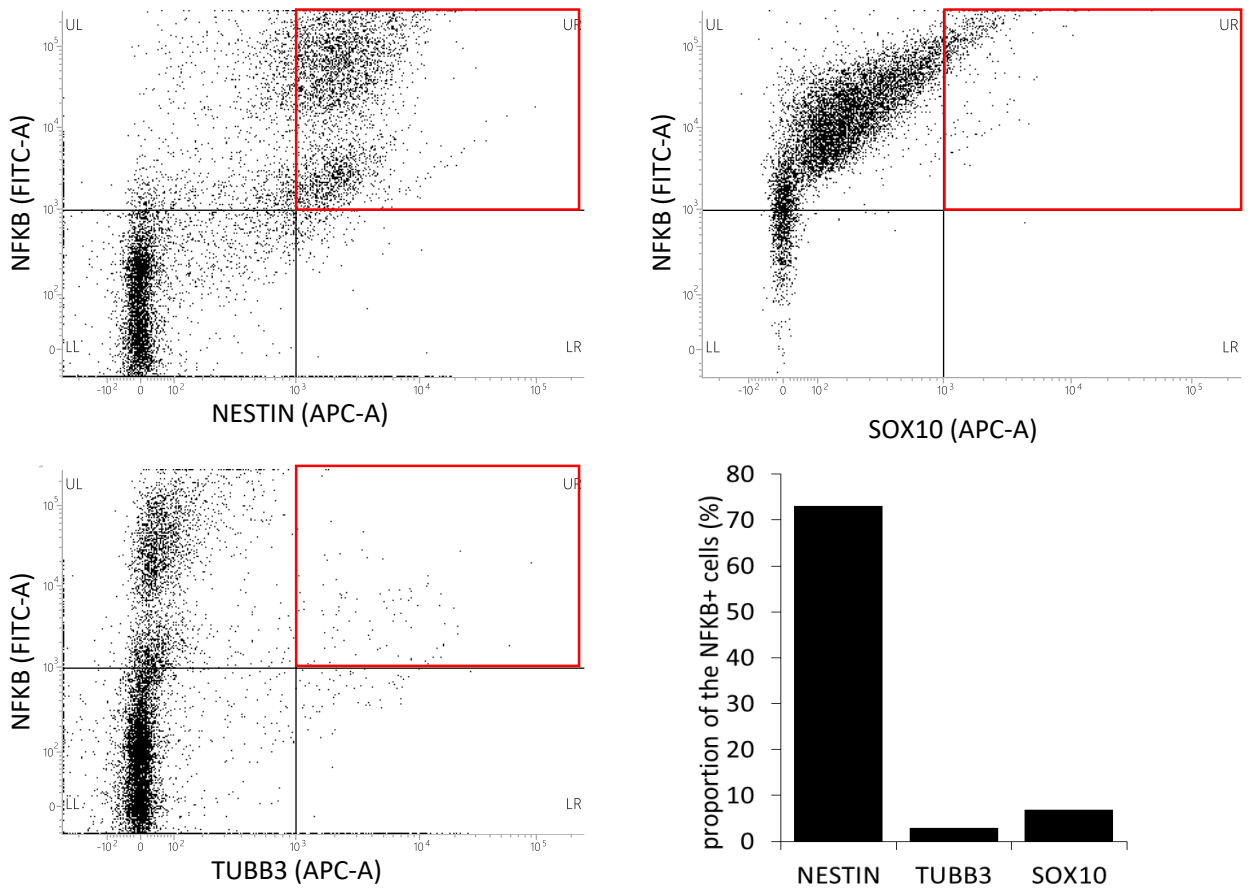

**Figure S2. FACS estimation of different neural lineages in NPC.**

**(A)** Populations of NFKB<sup>low</sup> and NFKB<sup>high</sup> NPC **(B)** analysed for expression neural stem cell marker Nestin, terminal differentiation marker TUBB3 and SOX10, a marker of neural crest cells. Related to Fig 3.

# Figure S3.

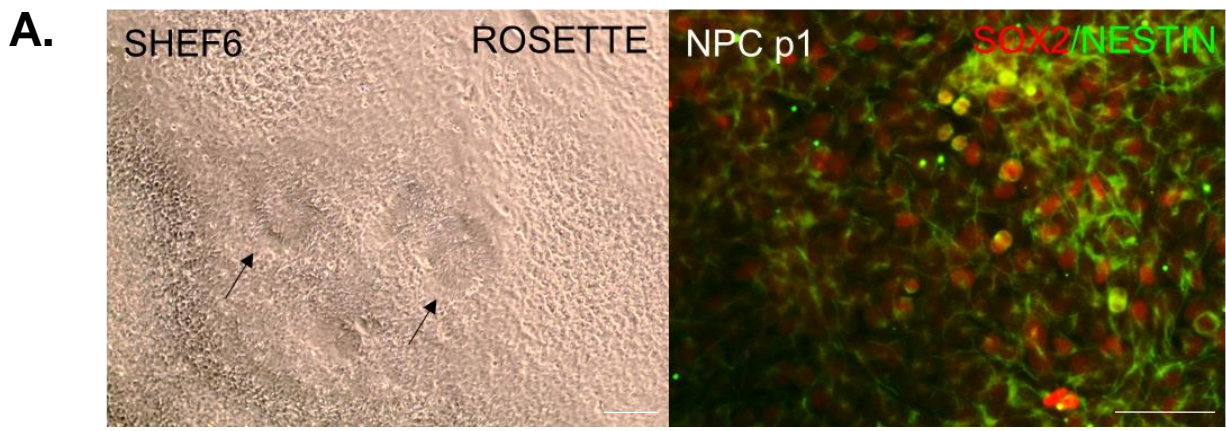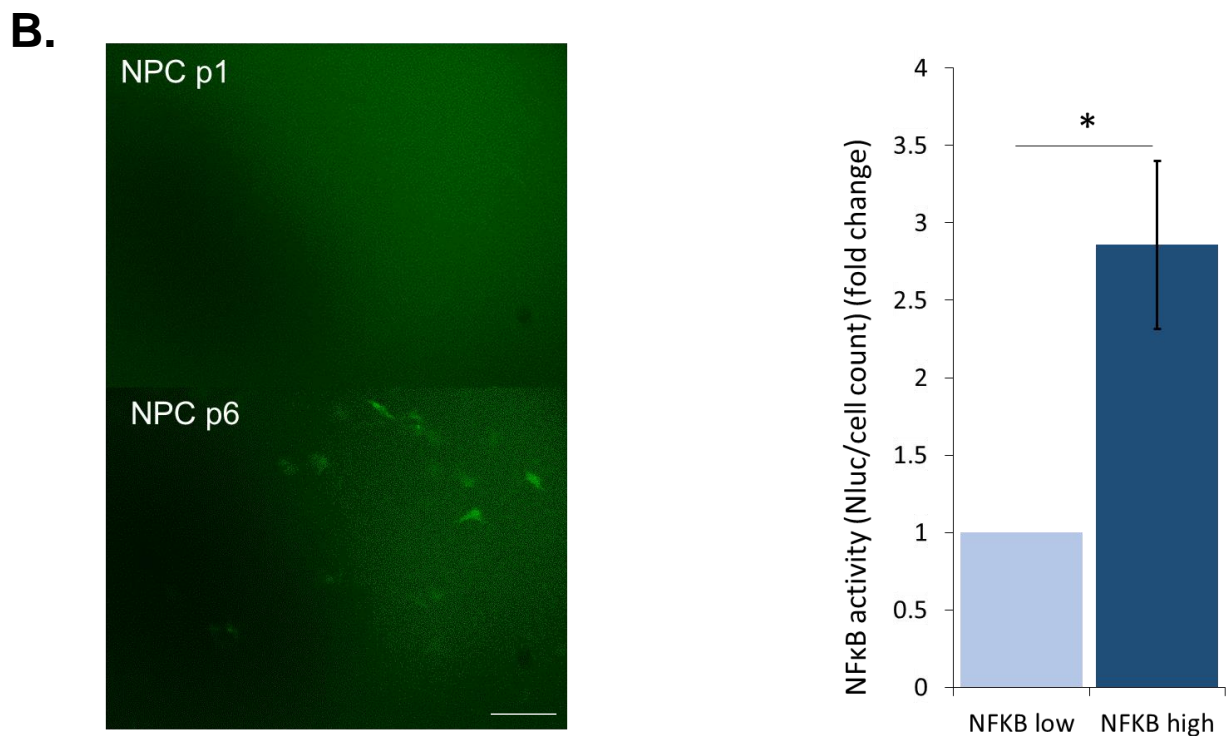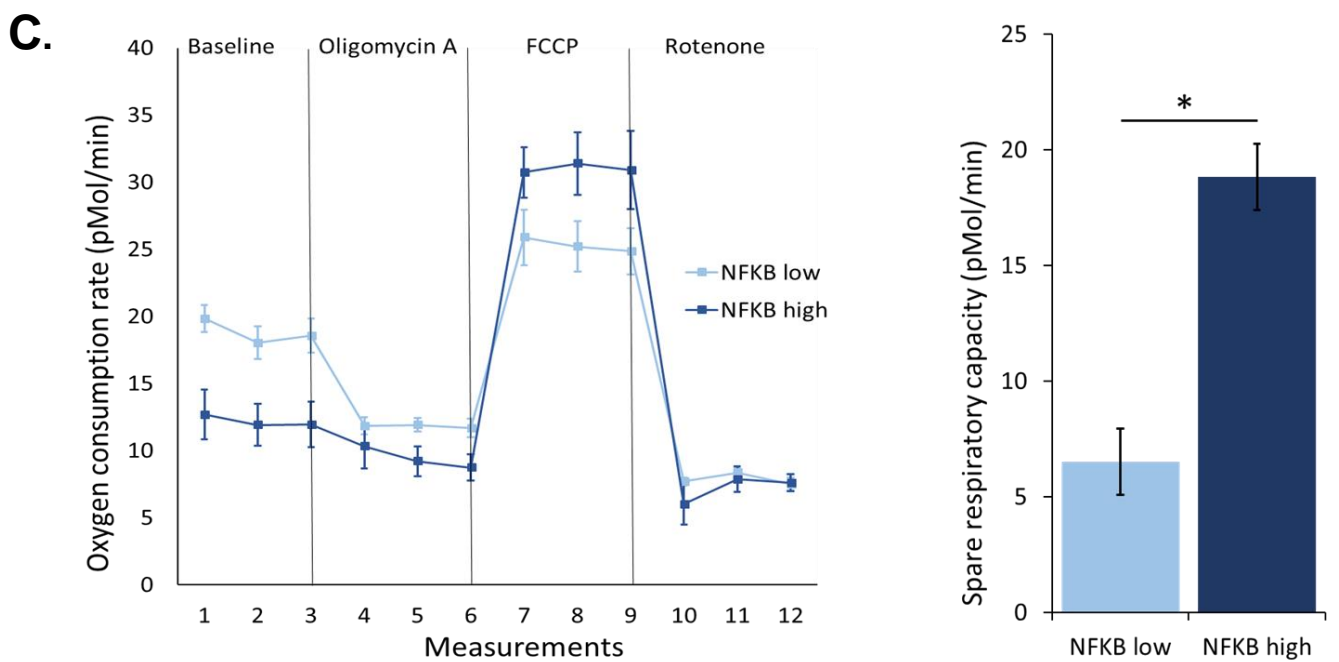

**Figure S3. Characterisation of a second hESC line, Shef6, throughout neural specification.** (A) Shef 6 hESC derived neural rosettes after neural induction (left) and early passage NPCs (p1) immunocytochemical analysis multipotency marker SOX2 and precursor marker, Nestin (right). (B) Qualitative (GFP) and quantitative analysis of early passage NPC (p0) and late passage NPC transduced with LNT-NFKB-NLUC. (C) Seahorse XFp analysis of Shef 6 NFKB<sup>low</sup> and NFKB<sup>high</sup> NPC, left, and spare respiratory capacity, right. (n=3, \*p<0.05, scale bars = 100µm), related to Fig. 1 and Fig. 3.

**Figure S4.**

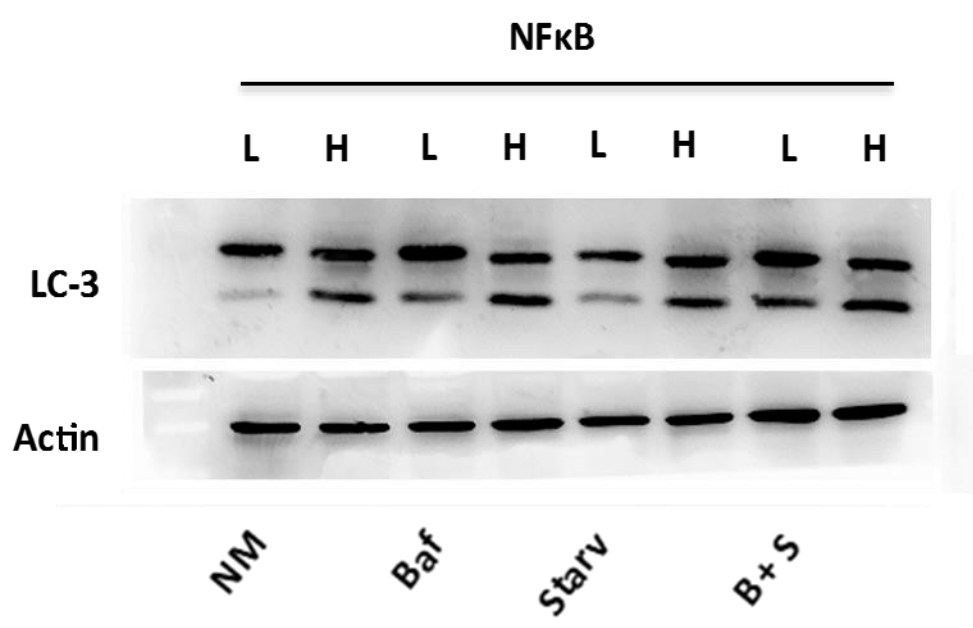

**Figure S4. Autophagy gene, LC3-II is activated in NFκB<sup>high</sup>-NPC.** Comparison of LC3I and LC3II in NFκB<sup>high</sup>- and NFκB<sup>low</sup>-NPC populations in normal media conditions, after treatment with bafilomycin A, under starvation conditions or with both starvation and bafilomycin A treatment, related to Fig. 4Ai .

**Figure S5.**

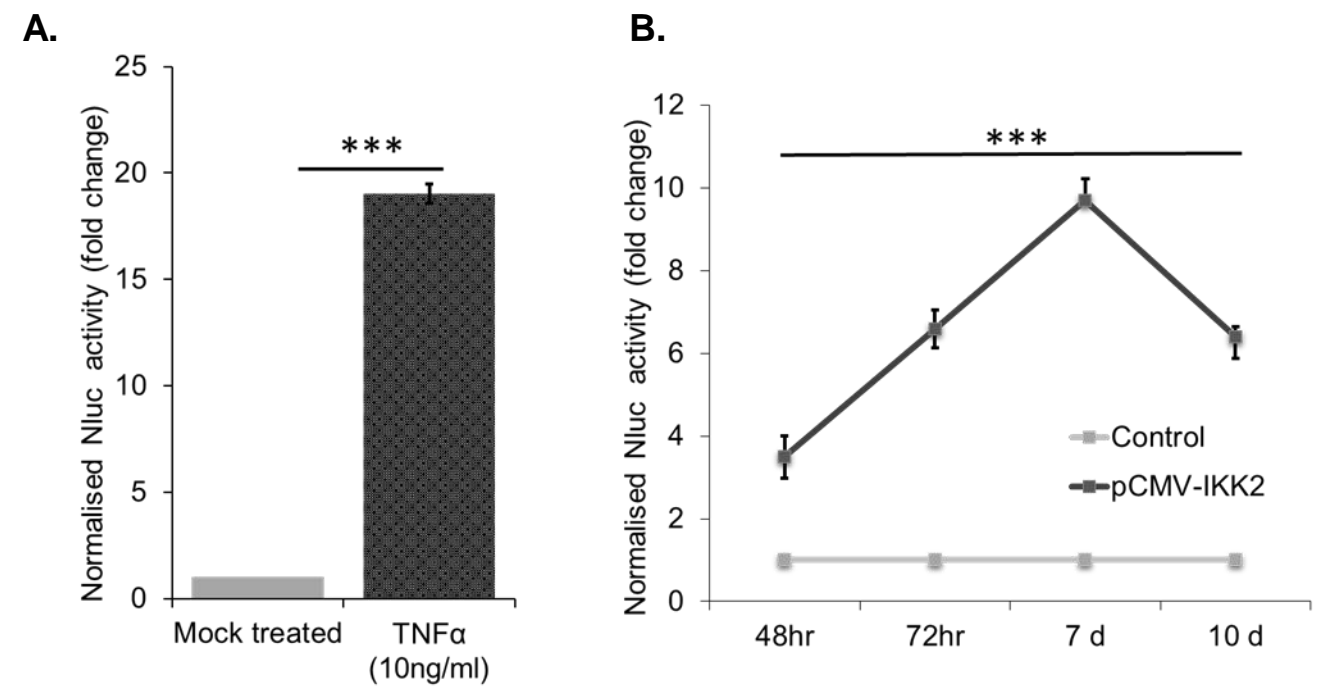

**Figure S5. Validation of NF $\kappa$ B agonists in NF $\kappa$ B<sup>low</sup>-NPC.** Confirmation of (A) TNF $\alpha$  and (B) IKK2 stimulation of the NF $\kappa$ B-NLuc/ reporter in NPC (All luminometry; n=3, \*\*\*p $\leq$ 0.001), related to Fig. 6.

## Figure S6.

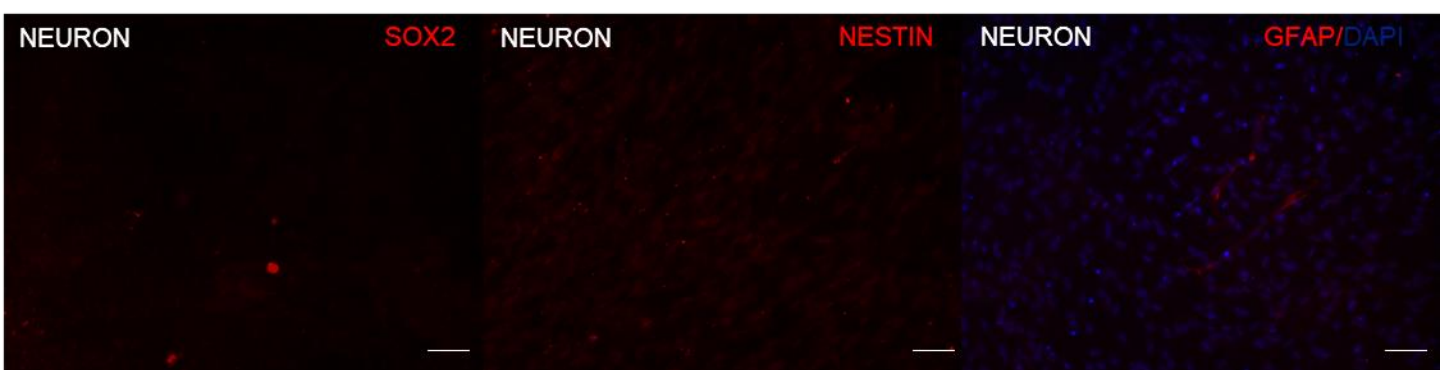

**Figure S6. Immunocytochemical analysis of terminally matured NFκB<sup>high</sup>-NPC.**  
Left-right: SOX2, Nestin and GFAP protein expression after terminal differentiation, related to Fig. 1A-D. Scale bar :100μm

| <b>Gene</b>             | <b>Primer sequence<br/>Forward (5'-3')</b> | <b>Primer sequence<br/>Reverse (5'-3')</b> |
|-------------------------|--------------------------------------------|--------------------------------------------|
| <b>LIN28A</b>           | AAGCGCAGATCAAAGGAGA                        | CTGATGCTCTGGCAGAAGTG                       |
| <b>NESTIN</b>           | GGCAGCGTTGGAACAGAG                         | CATCTTGAGGTCGCCAGCT                        |
| <b>MAP2</b>             | CTCAGCACCGCTAACAGAGG                       | CATCTTGAGGTCGCCAGCT                        |
| <b>SOX2</b>             | GACCAGCTCGCAGACCTACAT                      | TGGAGTGGGAGGAAGAGGTA                       |
| <b>PABPC4</b>           | GCTCAGGGAAGGCCTCCAT                        | GAGCGCTCAGCAGCAGCAACAG                     |
| <b>NQO1</b>             | GGGCAAGTCCATCCCAACTG                       | GCAAGTCAGGGAAGCCTGGA                       |
| <b>NFκB1</b>            | TGCCAACAGATGGCCCATAC                       | TGTTCTTTTCACTAGAGGCACCA                    |
| <b>GLUT1</b>            | AACTCTTCAGCCAGGGTCCAC                      | CACAGTGAAGATGATGAAGAC                      |
| <b>HO-1</b>             | CGGGACCTGACTGACTACC                        | TGAAGGTAGTTTCGTGGATGC                      |
| <b>ATP<br/>synthase</b> | CTTGACCTTCTTTGCGGCTC                       | CGCACGGACAGCATCTTTG                        |
| <b>UCP2</b>             | CCCCGAAGCCTCTACAATGG                       | CTGAGCTTGGAAATCGGACCTT                     |
| <b>GAPDH</b>            | GAAGGTGAAGGTCGGAGTC                        | GAAGATGGTGATGGGATTTTC                      |

Table S1. qPCR primer list
